# Supplementary material
Source: PubMed Central journal article supplement (PMC8871413)
Supplement: mmc1.pdf [file mmc1.pdf]

# THE LANCET

## Supplementary appendix

This appendix formed part of the original submission. We post it as supplied by the authors.

Supplement to: White NJ, Day NPJ, Ashley EA, et al. Have we really failed to roll back malaria?. *Lancet* 2022; **399**: 799–800.

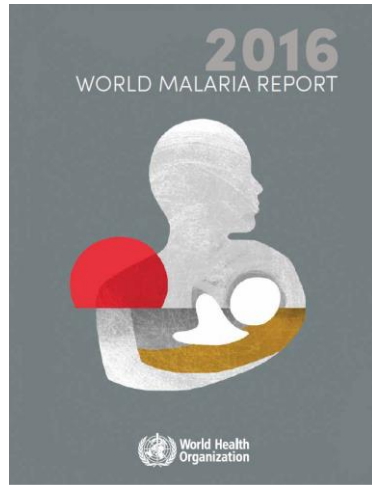

429000

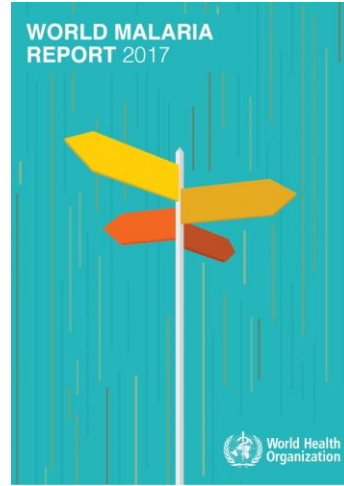

446000

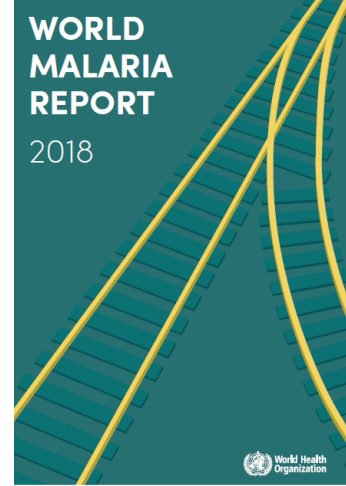

469000

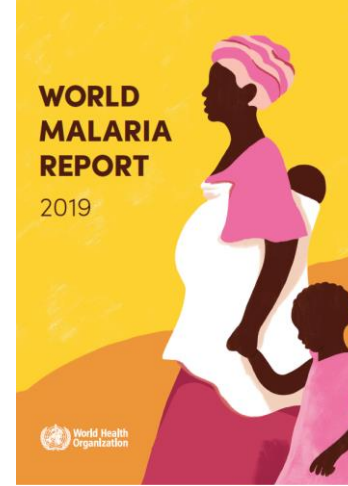

446000

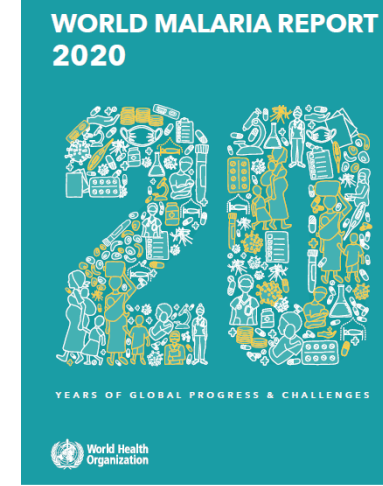

453000

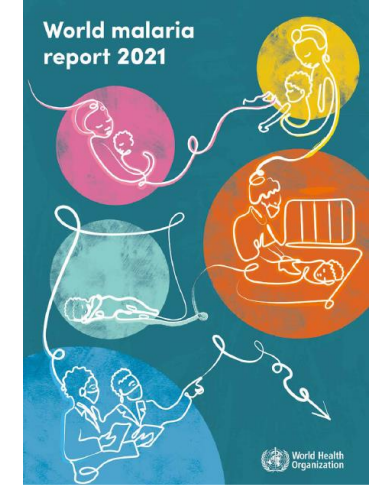

562000

## Malaria deaths

**Figure: Malaria deaths in 2015 as estimated in each successive world malaria report**
